# Supplementary figures and images for: Fabrication and characterization of β-carotene emulsions stabilized by soy oleosin and lecithin mixtures with a composition mimicking natural soy oleosomes
Source: Royal Society of Chemistry journal article supplement (doi:10.1039/d1fo01462e), 2021-01-01

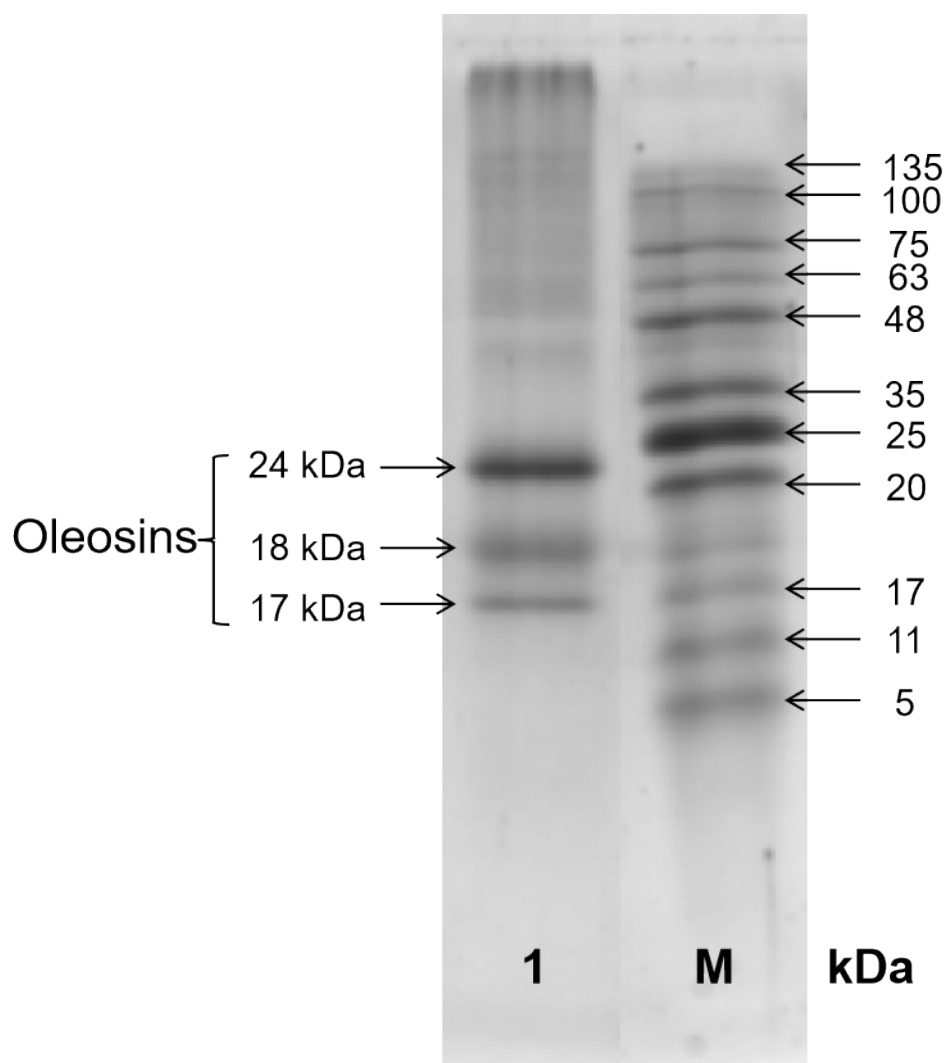

**Supplementary Fig.1** SDS-PAGE pattern of the extracted oleosins

Supplement: d1fo01462e1.pdf [file d1fo01462e1.pdf]
